# Supplementary material
Source: Springer Nature journal article supplement (https://www.springermedizin.de/resource/supplementary/12943_2014_1378_MOESM3_ESM.pdf/9552830)
Supplement: MOESM3 [file 9552830]

## MONC: ENST00000445461.2

ATCGCCTACTTCAGGCGGTGGCAAGCGTATGGAAATTATATTAGAACTTCAGCAAAGTGC  
ACAGCTGCATAATAGAGAAGCCGGCACTCAGATTGACAGGCAAATAAGCCAGCTTGTGGA  
AGGGGCCTCTGGGTGGCAGCTCTGGGCTTTTGGGTGTTGGACAACCATAGGCAAAACCTGA  
AATGGAACAGGGGCAGAAAATAGCACACTTTTACTCTACGCAACTGTTGCTTTTTTCATGA  
TCTTCAGGAATTTTACTGGGATAATTATCCAAATAAATGCAAGCATTCTATCCAAATGG  
AGCTCTTTCTGAGATGAAGAGAATTCTCAATGTCAAGATTTGAACAAGAAGAGAATGGAA  
TACACAATATGGACATCCATAAAAAATTCATCAGAGAGCATTTTACTACTGAGCTGCAAAG  
GGAAAACTTAAAATGGATATGAAAAGTGAAGAAAAGTGATCATAGGAGAAAACCATTTCA  
GATGACAAGAGCACCTCAAAGGCAGCAGCCTCAAGGAGCAGCCATGGCCCCAGACTTGTC  
GCACGGATGCAGAAAACCTAATGGAGGAGGCTGAGGTCAGAATGGGAAGAGTTTTTAAAA  
AATAAAAAGGGGAGCTAATATGTGAGGAAGTATTGCTGTGCATTATTTTCCACTGAACA  
GACCTTCTTTTAACTTCTAATCTCAAGCACATAGCAGCTGTTGTTTTTCAT
